# Supplementary material for: Interleukin-17 inhibits Adult Hippocampal Neurogenesis
Source: PubMed Central journal article supplement — Sci Rep. 2014 Dec 19;4:7554. doi: 10.1038/srep07554 (PMC4271266; doi:10.1038/srep07554), 2014-12-19
Supplement: srep07554-s1.pdf [file srep07554-s1.pdf]

# Interleukin-17 is a Negative Regulator of Adult Hippocampal Neurogenesis

Qiang Liu<sup>1,2#</sup>, Wei Xin<sup>1#</sup>, Ping He<sup>3</sup>, Dharshaun Turner<sup>1</sup>, Junxiang Yin<sup>1</sup>, Yan Gan<sup>1</sup>, Fu-Dong Shi<sup>1,2\*</sup>, and Jie Wu<sup>1,4\*</sup>.

<sup>1</sup>Divisions of Neurology, Barrow Neurological Institute, St. Joseph's Hospital and Medical Center, Phoenix, AZ, USA;

<sup>2</sup>Department of Neurology and Tianjin Neurological Institute, Tianjin Medical University General Hospital, Tianjin 300052, China

<sup>3</sup>Department of Chemical Engineering, Arizona State University, Tempe, AZ, USA.

<sup>4</sup>Department of Physiology, Shantou University of Medical College, Shantou, Guangdong, China

\*Correspondence:

\*J.W., Barrow Neurological Institute, Division of Neurology, Barrow Neurological Institute, St. Joseph's Hospital and Medical Center, Phoenix, AZ 85013. USA. E-mail: jie.wu@DignityHealth.org

or

\*F.S., Barrow Neurological Institute, Division of Neurology, Barrow Neurological Institute, St. Joseph's Hospital and Medical Center, Phoenix, AZ 85013. USA. E-mail: Fu-Dong.Shi@DignityHealth.org

#These authors contributed equally to this work.

**Supplemental Table 1. Real-time RT PCR primer sequences.**

| Primer        | Forward                | Reverse                 |
|---------------|------------------------|-------------------------|
| IL-17         | GGCCCTCAGACTACCTCAAC   | TCTCGACCCTGAAAGTGAAGG   |
| IL-17R        | GTTGCATGTTGAGTGGACCCT  | GAACAGTCACTTCATACTCCTGG |
| TNF $\alpha$  | GACGTGGAAGTGGCAGAAGAG  | TGCCACAAGCAGGAATGAGA    |
| IL-1          | GAAATGCCACCTTTTGACAGTG | CTGGATGCTCTCATCAGGACA   |
| IL-4          | CCCCAGCTAGTTGTCATCCTG  | CGCATCCGTGGATATGGCTC    |
| IL-6          | CTGCAAGAGACTTCCATCCAG  | AGTGGTATAGACAGGTCTGTTGG |
| IL-10         | GCAGCTCTAGGAGCATGTGG   | ACAGCCGGGAAGACAATAACT   |
| IFN- $\gamma$ | ATGAACGCTACACACTGCATC  | TCTAGGCTTTCAATGACTGTGC  |
| NGN2          | GGTCTGGTACACGATTGCAAAC | GCTGTTGGTGCAACTCCACGT   |
| MASH1         | GCAACCGGGTCAAGTTGGT    | CAAGTCGTTGGAGTAGTTGGG   |
| NeuroD1       | GACGGGGTCCCAAAAAGAAAA  | GCCAAGCGCAGTGTCTCTATT   |
| HES1          | CGGCTTCAGCGAGTGCAT     | CGGTGTTAACGCCCTCACA     |
| Id2           | ACAACATGAACGACTGCT     | ATTTCCATCTTGGTCACC      |
| GAPDH         | AAGAGAGAGGCCCTCAGTTGCT | TTGTGAGGGAGATGCTCAGTGT  |
